# Supplementary material
Source: Royal Society of Chemistry journal article supplement (doi:10.1039/d6ta02063a)
Supplement: d6ta02063a1.pdf [file d6ta02063a1.pdf]

## Supporting Information

### **Time-Phase-Controlled Exsolution of FeCoNi Ternary Alloy Nanoparticles on Perovskite Anode Catalyst for Enhanced Dual-Functional Catalysis and Protection in Ammonia-Fueled Protonic Ceramic Fuel Cells**

*Xiaole Yu*<sup>a †</sup>, *Zenan Zhao*<sup>a †</sup>, *Bingyu He*<sup>a</sup>, *Zhanheng Jin*<sup>a</sup>, *Zhexiang Yu*<sup>a</sup>, *Qing Ni*<sup>b</sup>,  
*Sheng Cui*<sup>a</sup>, *Lin Ge*<sup>a,\*</sup>

<sup>a</sup> College of Materials Science and Engineering, Nanjing Tech University, No. 30 South  
Puzhu Road, Nanjing, Jiangsu 211816, China

<sup>b</sup> School of Automobile and Intelligent Traffic, Jiangsu Vocational College of  
Information Technology, No. 1 Qianou Road, Wuxi, Jiangsu 214153, China

† Xiaole Yu and Zenan Zhao contributed equally to this work.

E-mail: Corresponding to: Lin Ge ([gelin2013@njtech.edu.cn](mailto:gelin2013@njtech.edu.cn))

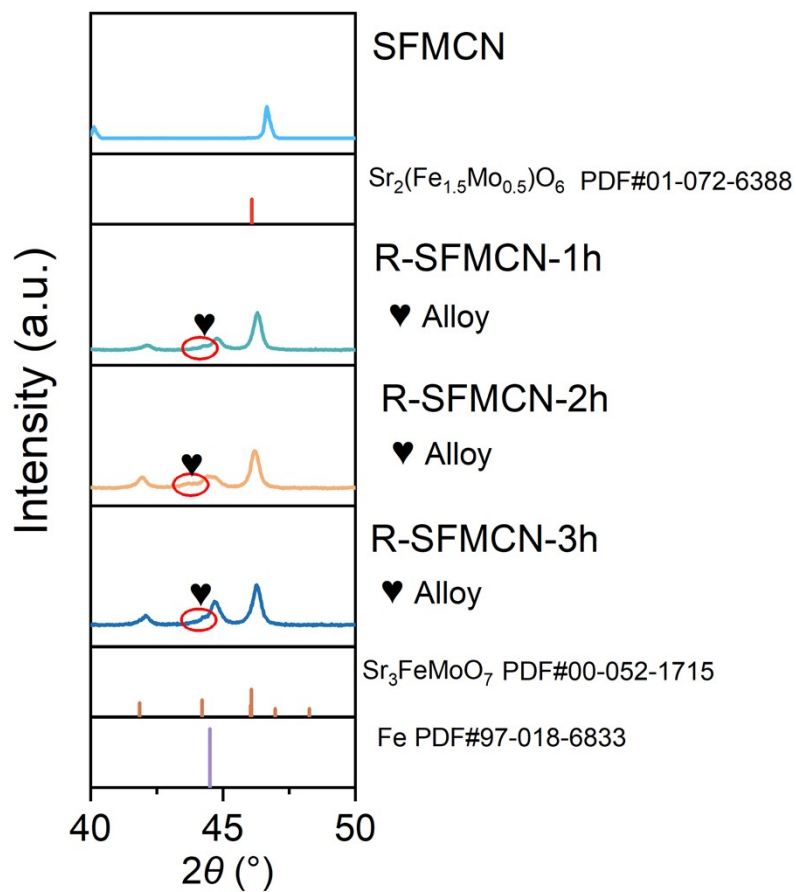

Figure S1. The enlarged view of XRD patterns.

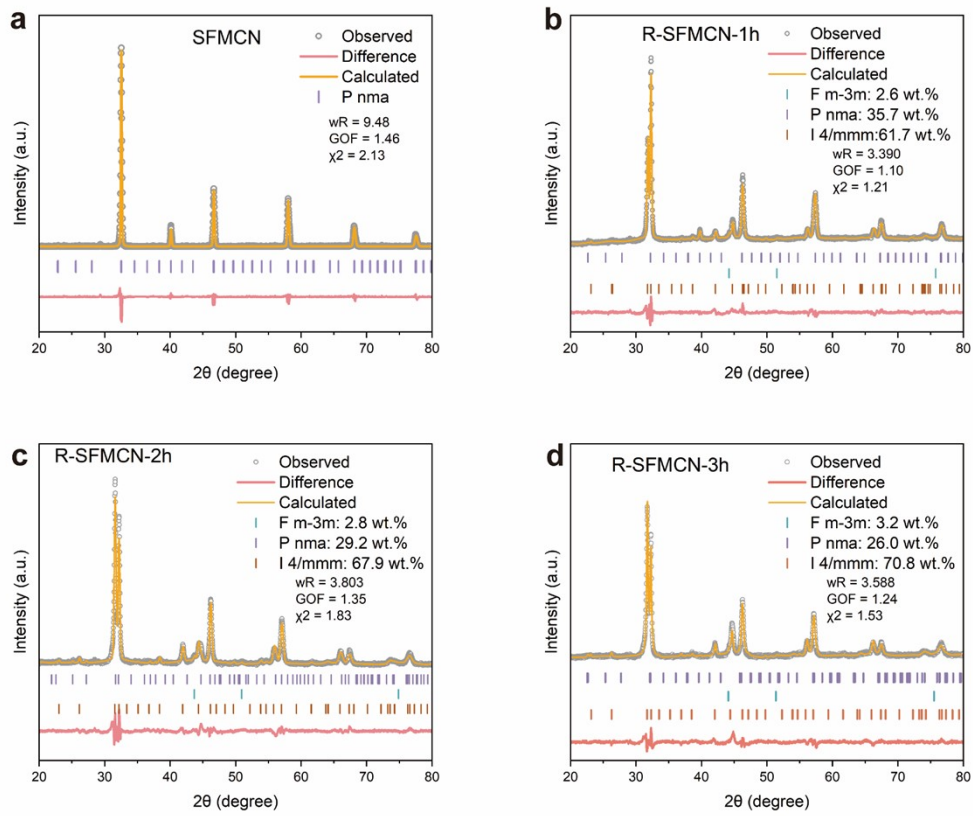

Figure S2. Rietveld refinement results of SFMCN and R-SFMCN samples.

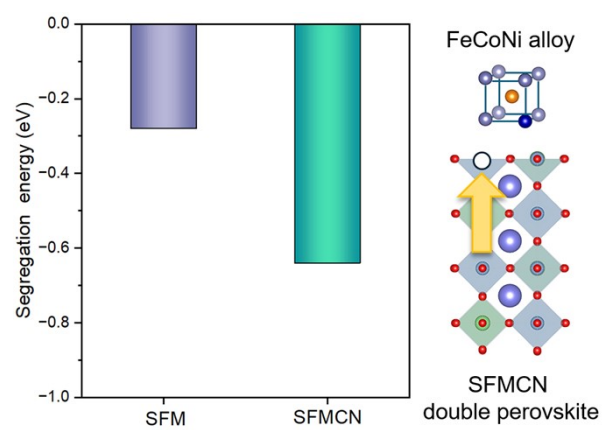

Figure S3. The segregation energies of Fe in SFM and SFMCN perovskites.

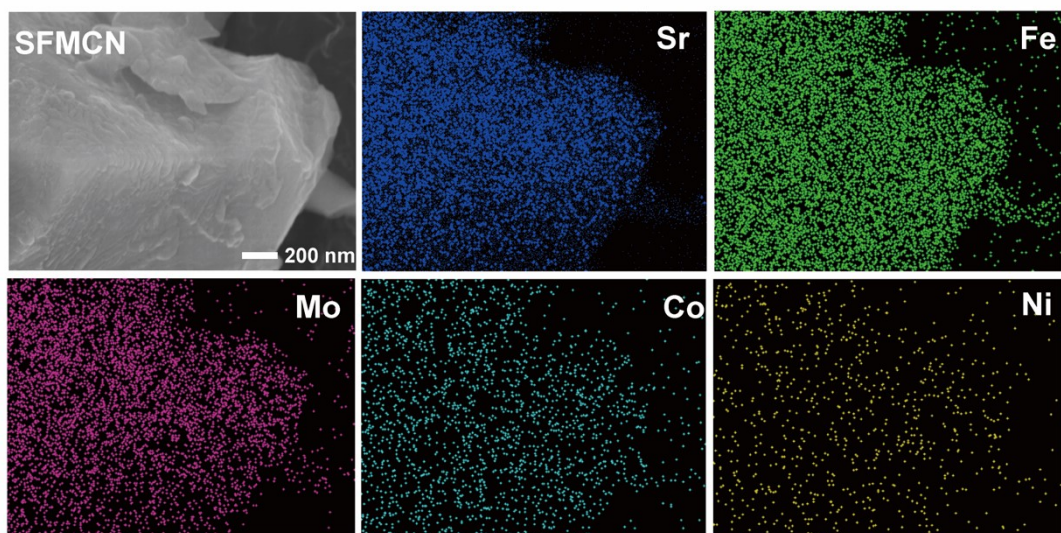

Figure S4. SEM images and EDS-mapping of prepared SFMCN powders.

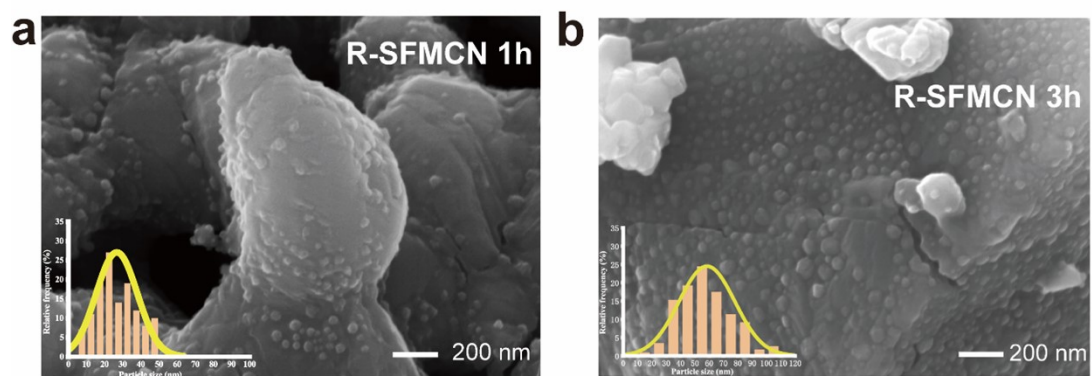

Figure S5. SEM results of SFMCN after (a) 1 hour and (b) 3 hours after reducing atmosphere.

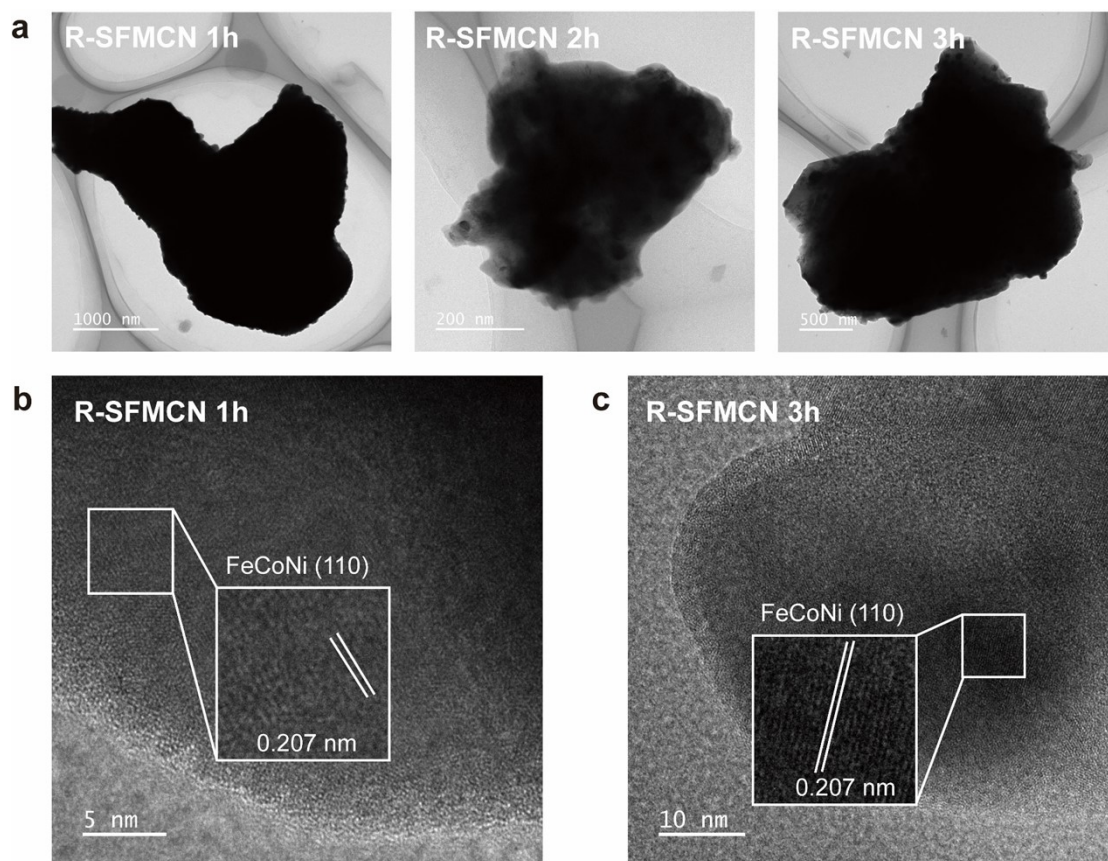

Figure S6. (a) TEM images of R-SFMCN- $x$  ( $x=1, 2, 3$ ) samples; TEM images with clear fringes of (b) R-SFMCN-1h and (c) R-SFMCN-3h.

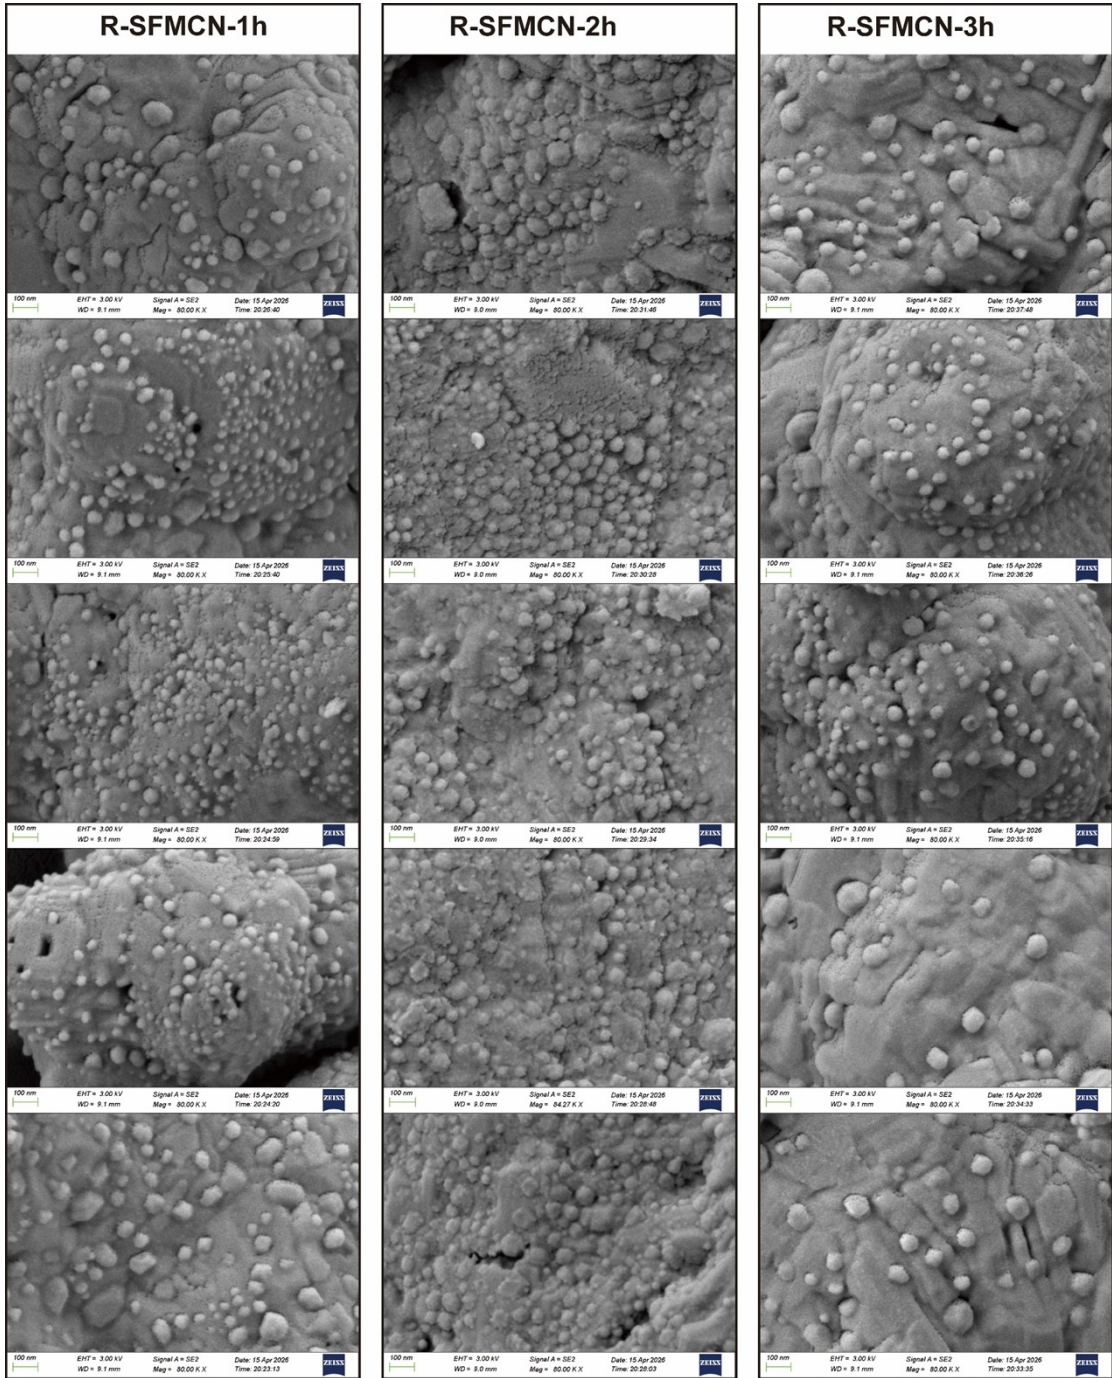

Figure S7. The SEM photographs used for TPB statistics.

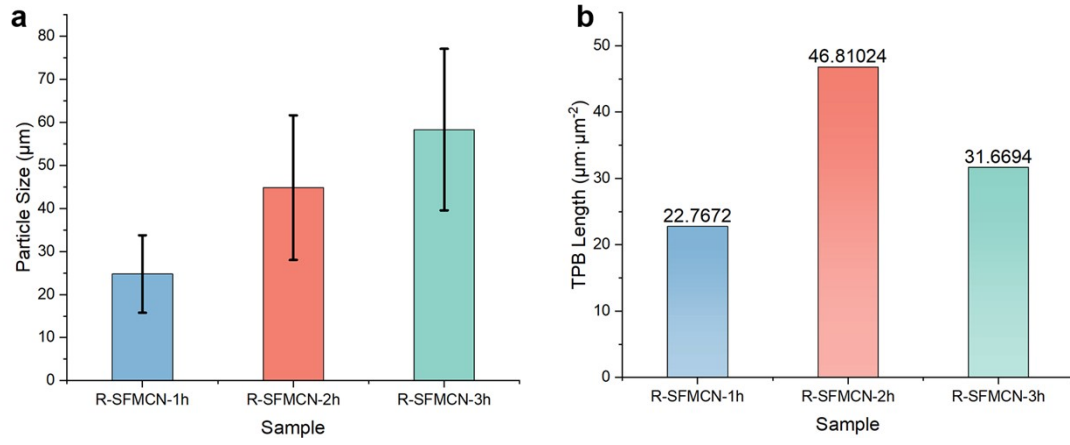

Figure S8. The TPB statistics results.

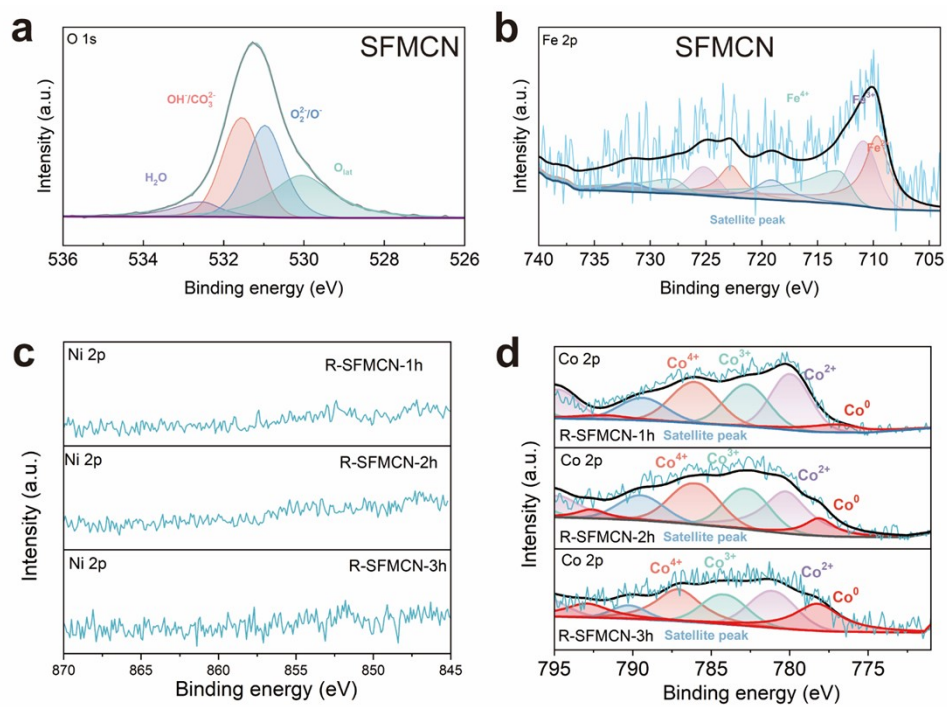

Figure S9. XPS spectra of (a) O 1s and (b) Fe 2p in SFMCN; XPS spectra of (c) Co 2p and (d) Ni 2p in R-SFMCN samples.

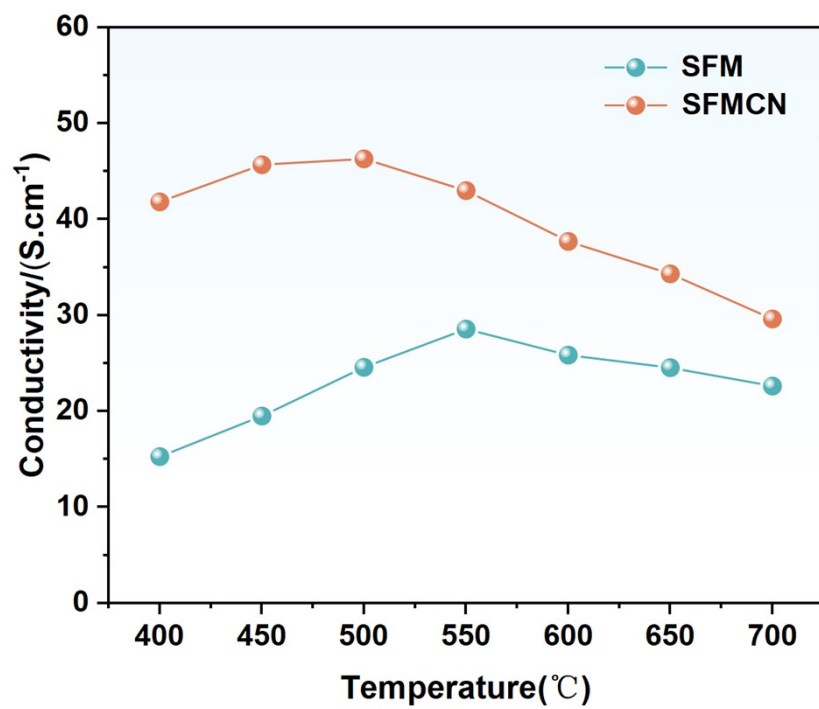

Figure S10. Total conductivity of SFM and SFMCN in air.

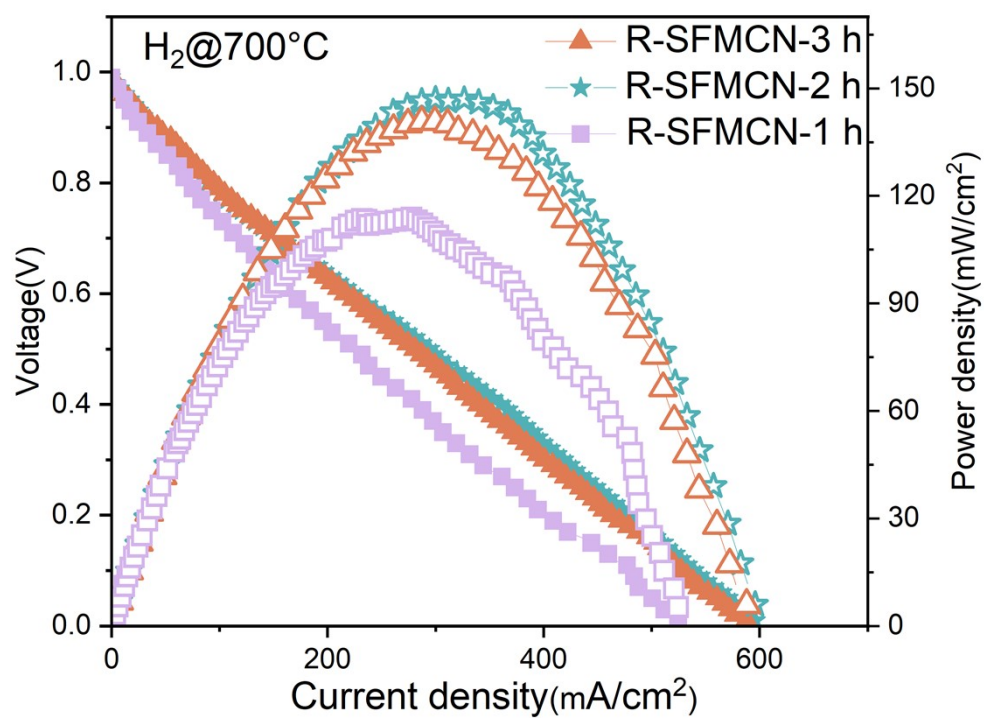

Figure S11. I-V-P plots of symmetrical cell with SFMCN ACL in  $\text{NH}_3$ .

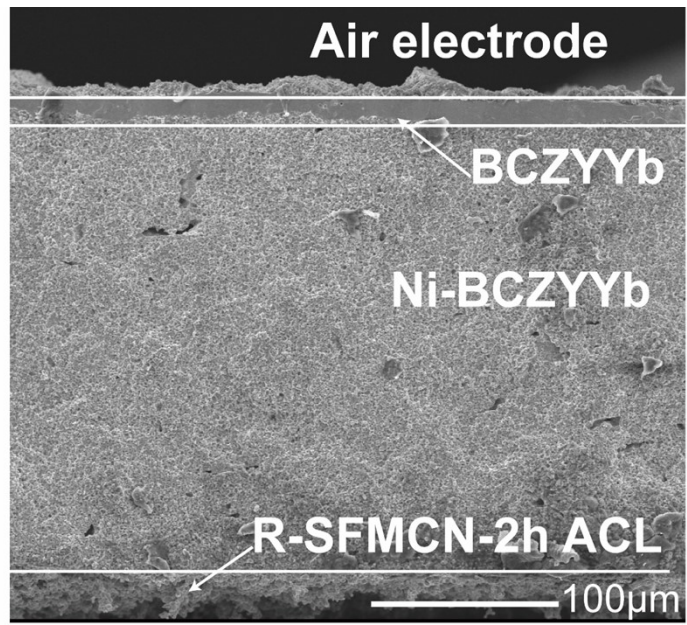

Figure S12. The SEM image of the cross-section of single cell with SFMCN ACL.

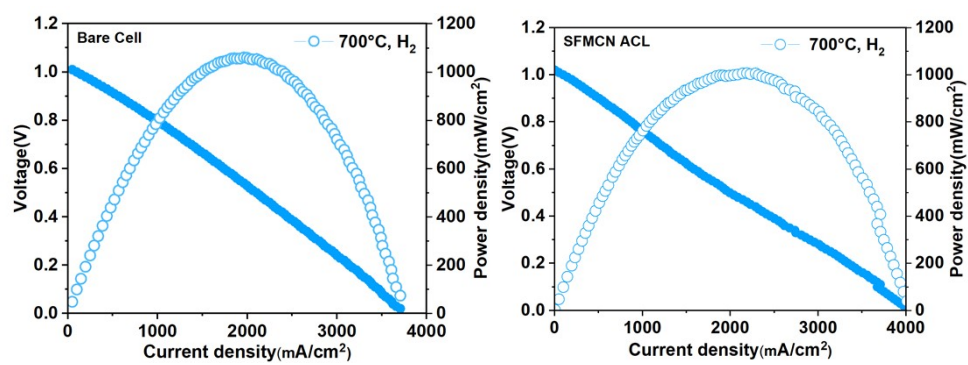

Figure S13. I-V-P plots of bare cell and single cell with R-SFMCN-2h ACL in H<sub>2</sub>.

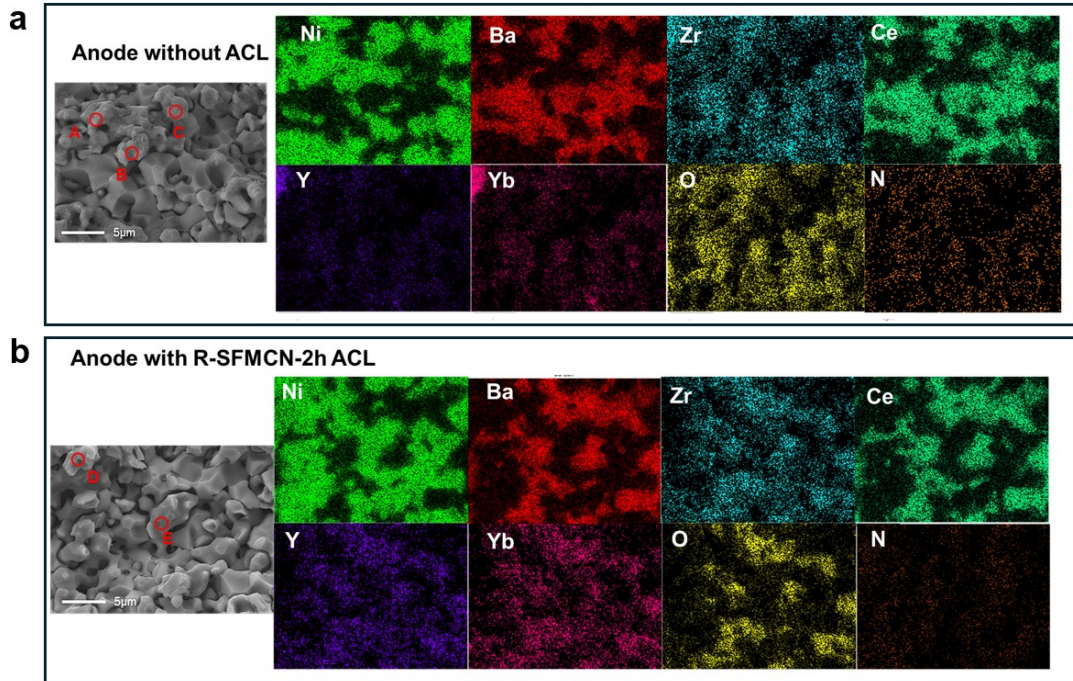

Figure S14. EDS mapping results of (a) anode without ACL and (b) anode with R-SFMCN-2h ACL after durability test.

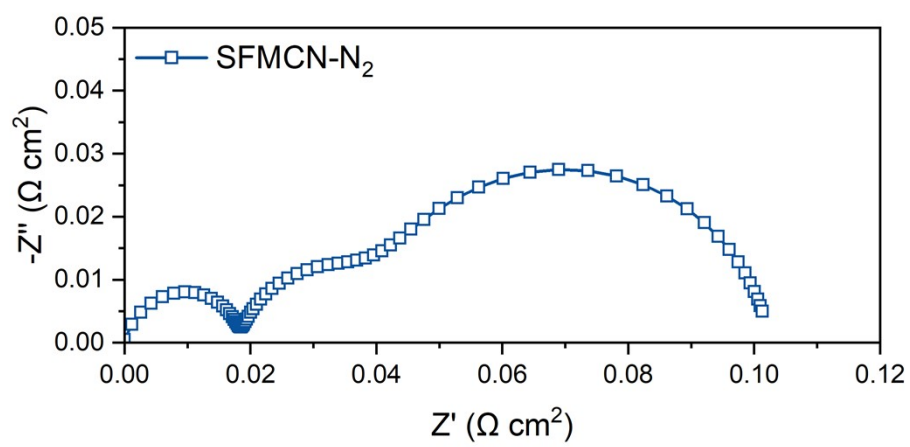

Figure S15. EIS plots of SFMCN in  $N_2$  atmosphere.

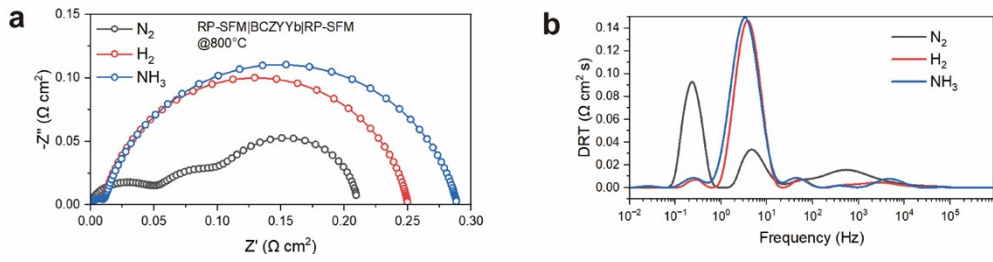

Figure S16. (a) EIS plots and (b) DRT curves of RP-SFM in different atmosphere.

Table S1 XRD refinement result of reduced SFMCN.

| Sample   | Space group | a (Å)  | b (Å)  | c(Å)    | wR    | GOF  | $\chi^2$ | wt.% |
|----------|-------------|--------|--------|---------|-------|------|----------|------|
| SFMCN    | Pnma        | 5.4902 | 5.4896 | 7.7768  | 9.48  | 1.46 | 2.13     | /    |
| R-SFMCN- | Pnma        | 5.5683 | 5.5676 | 7.8637  |       |      |          | 35.7 |
| 1h       | Fm-3m       | 3.5509 | 3.5509 | 3.5509  | 3.390 | 1.10 | 1.21     | 2.6  |
|          | I 4/mmm     | 3.9291 | 3.9291 | 20.2839 |       |      |          | 61.7 |
| R-SFMCN- | Pnma        | 5.5599 | 5.5593 | 8.0969  |       |      |          | 29.2 |
| 2h       | Fm-3m       | 3.5817 | 3.5817 | 3.5817  | 3.803 | 1.35 | 1.82     | 2.8  |
|          | I 4/mmm     | 3.9280 | 3.9280 | 20.4054 |       |      |          | 67.9 |
| R-SFMCN- | Pnma        | 5.5741 | 5.5734 | 7.9243  |       |      |          | 26.0 |
| 3h       | Fm-3m       | 3.5602 | 3.5602 | 3.5602  | 3.588 | 1.24 | 1.53     | 3.2  |
|          | I 4/mmm     | 3.9288 | 3.9288 | 20.429  |       |      |          | 70.8 |

Table S2 Fitting results of Fe 2p from XPS spectra

| Sample     | Fe 2p            |                  |                  |                 |
|------------|------------------|------------------|------------------|-----------------|
|            | Fe <sup>4+</sup> | Fe <sup>3+</sup> | Fe <sup>2+</sup> | Fe <sup>0</sup> |
| SFMCN      | 26.95%           | 33.98%           | 39.06%           | 0%              |
| R-SFMCN-1h | 10.85%           | 29.71%           | 57.14%           | 2.28%           |
| R-SFMCN-2h | 9.13%            | 36.54%           | 50.76%           | 3.55%           |
| R-SFMCN-3h | 23.42%           | 25.68%           | 45.04%           | 5.85%           |

Table S3 Fitting results of O 1s from XPS spectra

| Sample     | O 1s                                                                                               |                  |                                  |
|------------|----------------------------------------------------------------------------------------------------|------------------|----------------------------------|
|            | O <sub>ads</sub> (OH <sup>-</sup> +O <sup>-</sup> /O <sub>2</sub> <sup>2-</sup> +H <sub>2</sub> O) | O <sub>lat</sub> | O <sub>c</sub> /O <sub>lat</sub> |
| SFMCN      | 73.18%                                                                                             | 26.82%           | 1.96                             |
| R-SFMCN-1h | 75.54%                                                                                             | 24.46%           | 3.08                             |
| R-SFMCN-2h | 78.64%                                                                                             | 21.36%           | 3.68                             |
| R-SFMCN-3h | 81.59%                                                                                             | 18.41%           | 4.43                             |

Table S4. point EDS scanning results of SEM samples.

| Sample Point | Without ACL |            |            | With ACL   |            |
|--------------|-------------|------------|------------|------------|------------|
| Elements     | A<br>Atom%  | B<br>Atom% | C<br>Atom% | D<br>Atom% | E<br>Atom% |
| N            | 5.20        | 2.30       | 6.58       | 0.00       | 0.00       |
| O            | 18.10       | 19.90      | 27.74      | 10.06      | 4.38       |
| Ni           | 74.67       | 76.58      | 64.61      | 87.64      | 93.85      |
| Y            | 0.13        | 0.06       | 0.00       | 0.26       | 0.00       |
| Zr           | 0.08        | 0.04       | 0.00       | 0.23       | 0.00       |
| Ba           | 0.66        | 0.35       | 0.50       | 0.84       | 0.74       |
| Ce           | 0.39        | 0.39       | 0.29       | 0.56       | 0.62       |
| Yb           | 1.30        | 0.77       | 0.39       | 0.40       | 0.41       |
